# Supplementary material
Source: PubMed Central journal article supplement (PMC2427172)
Supplement: mmc1.pdf [file mmc1.pdf]

**Supplemental Data**

**On the Use of General Control Samples**

**for Genome-wide Association Studies:**

**Genetic Matching Highlights Causal Variants**

**Diana Luca, Steven Ringquist, Lambertus Klei, Ann B. Lee, Christian Gieger, H.-Erich Wichmann, Stefan Schreiber, Michael Krawczak, Ying Lu, Alexis Styche, Bernie Devlin, Kathryn Roeder, and Massimo Trucco**

Figure S1.Genotype Cluster Plots for All SNPs Producing a p Value < 0.00001 for the fMatch Analysis

rs12751725

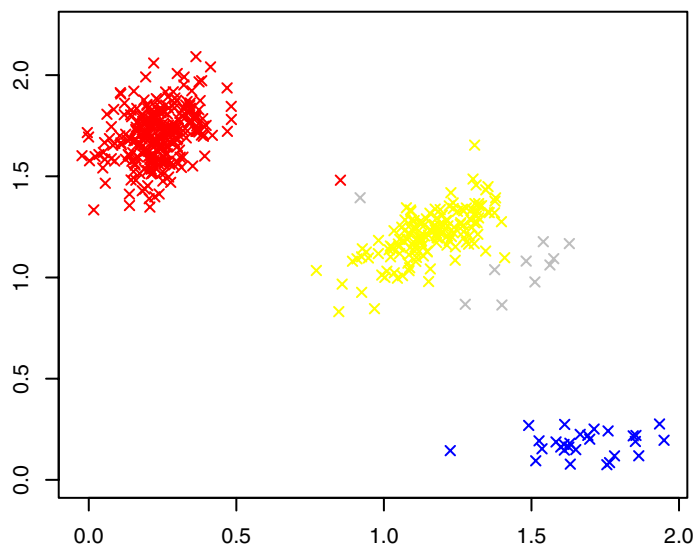

rs12751725

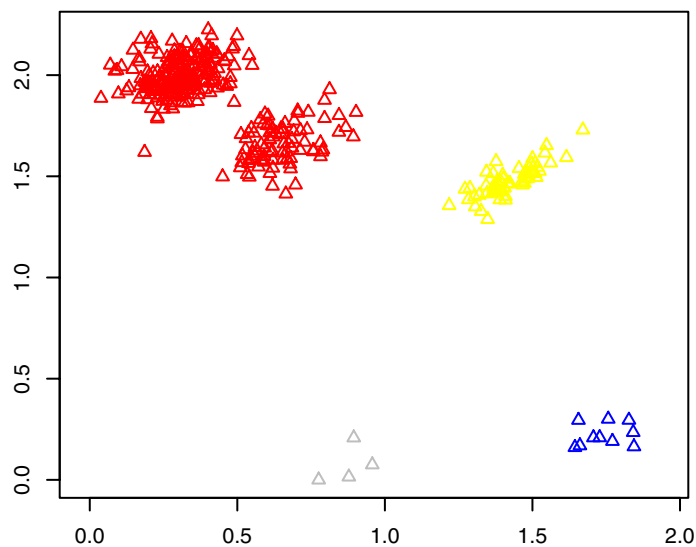

rs223185

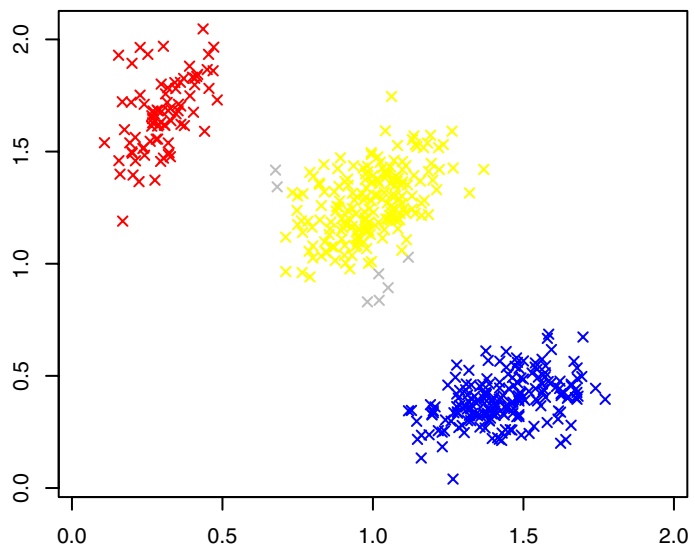

rs223185

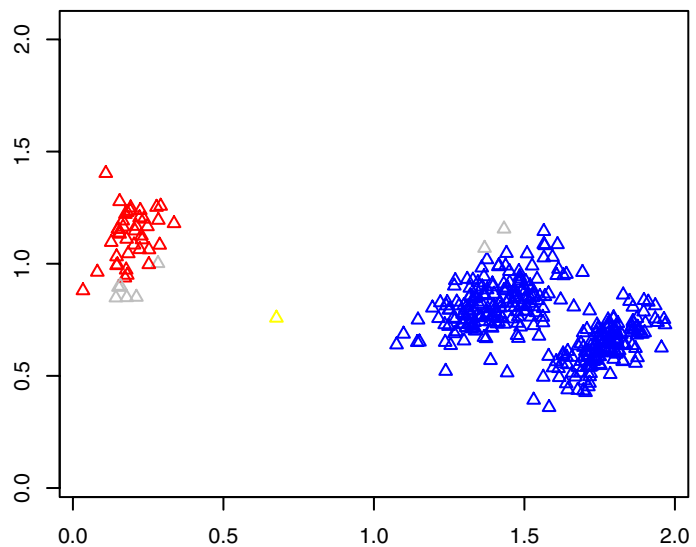

rs6668411

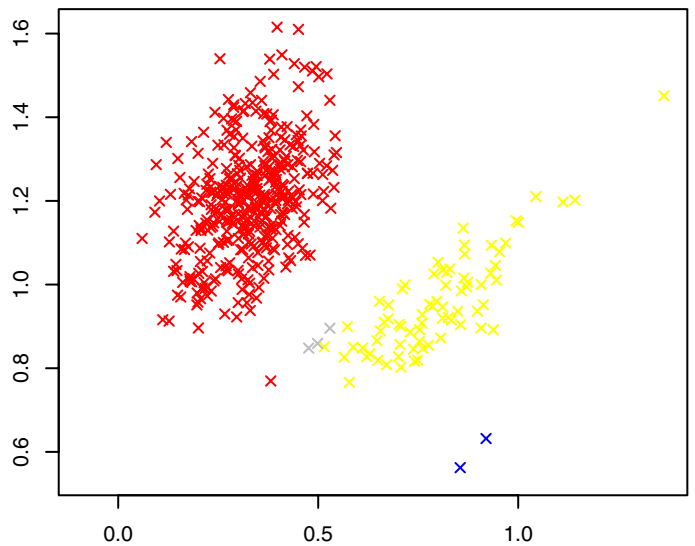

rs6668411

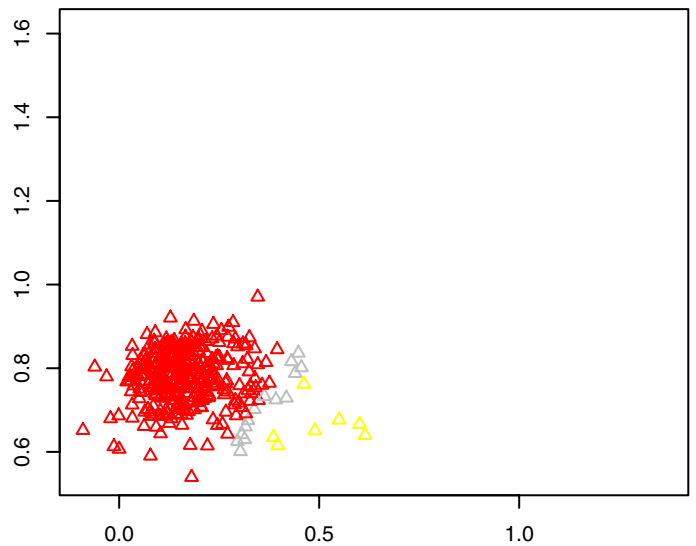

**rs4518935**

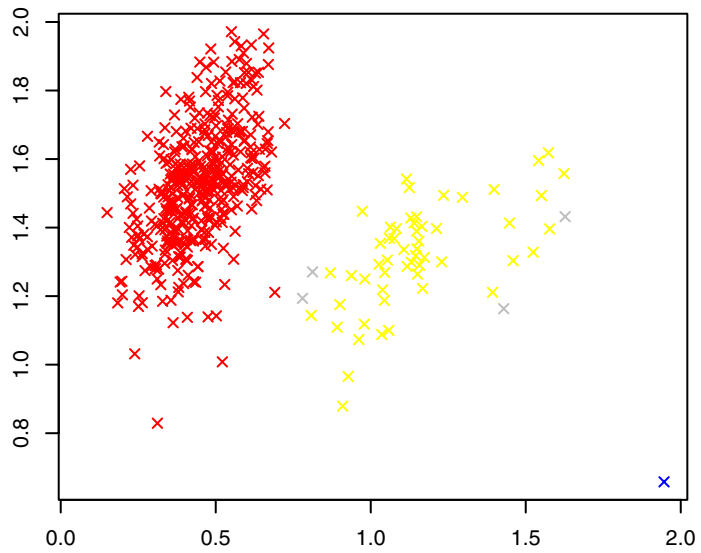

**rs4518935**

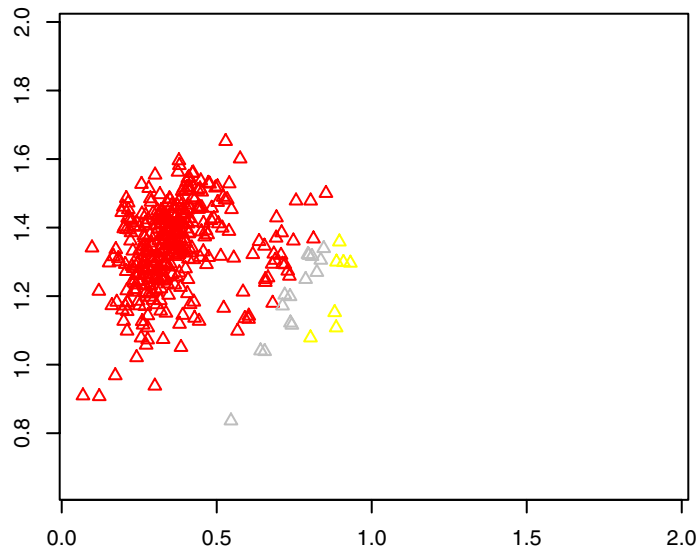

**rs4853775**

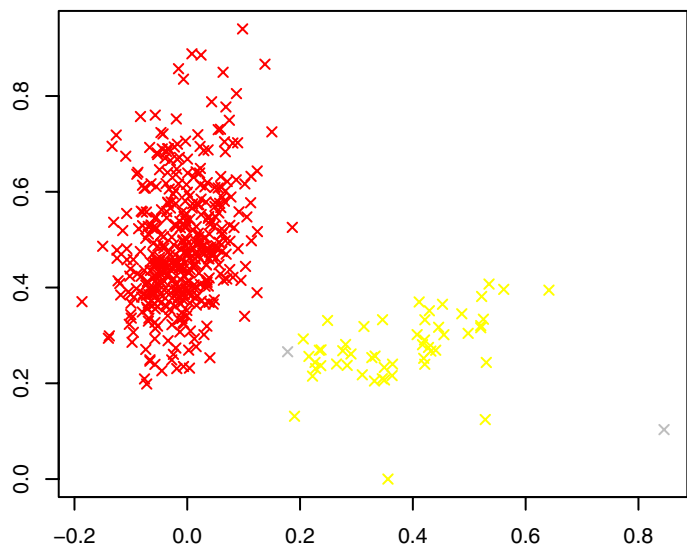

**rs4853775**

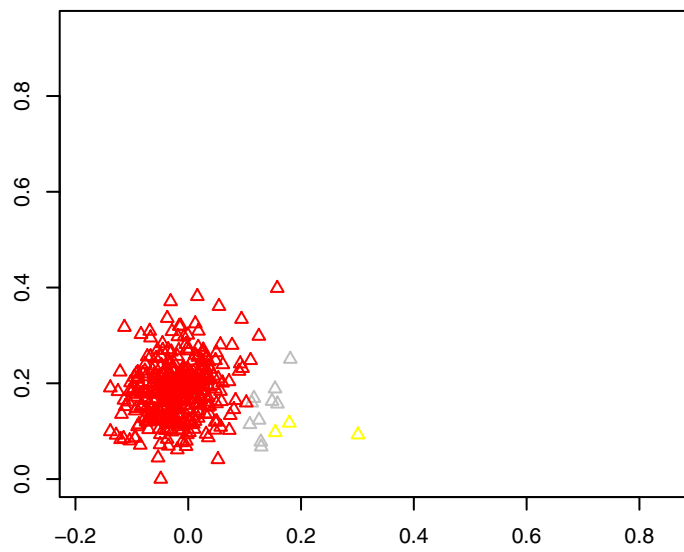

**rs1035680**

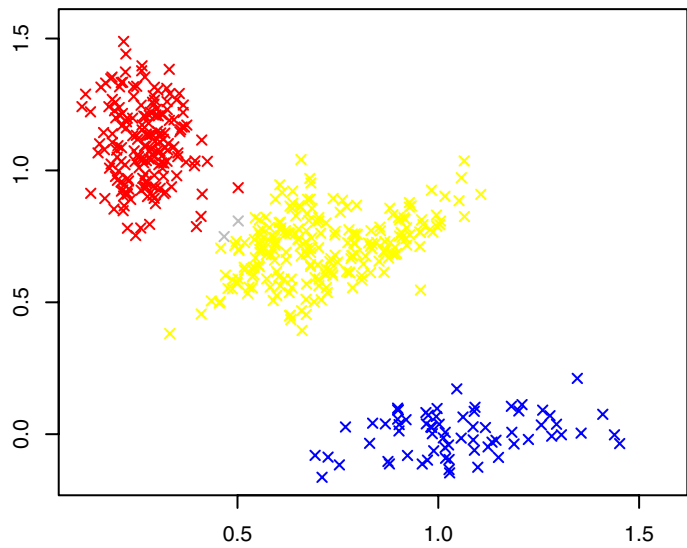

**rs1035680**

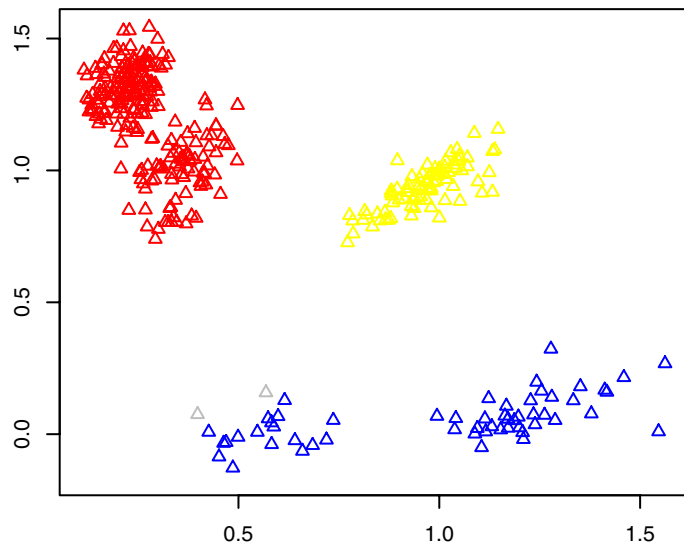

**rs11737460**

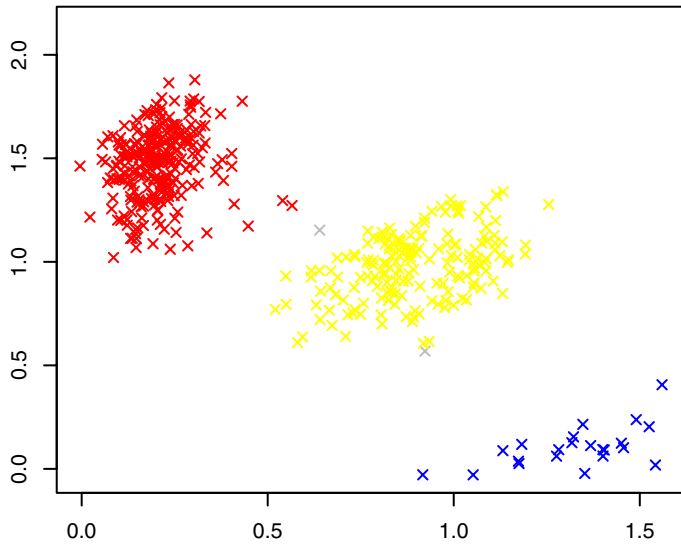

**rs11737460**

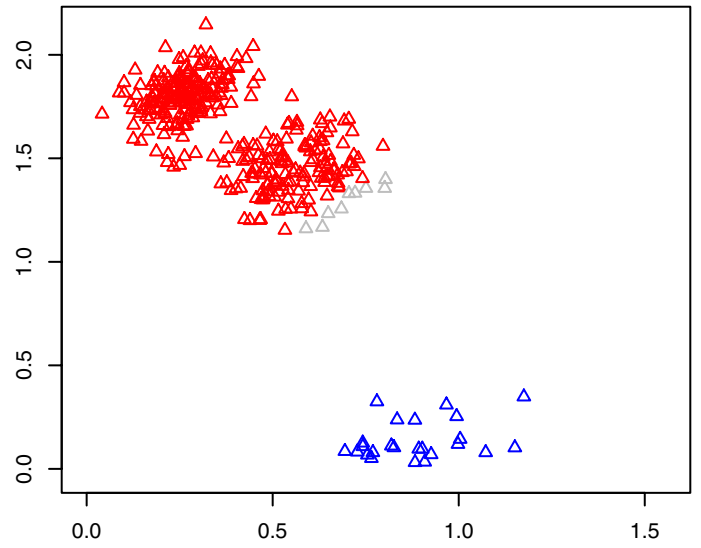

**rs950286**

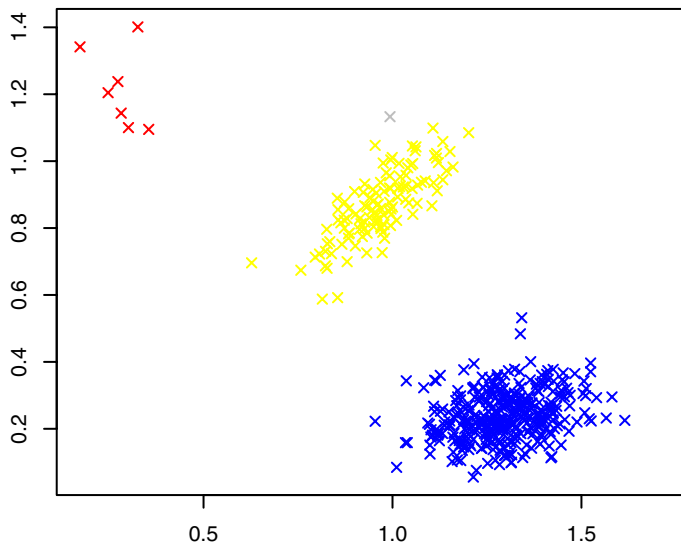

**rs950286**

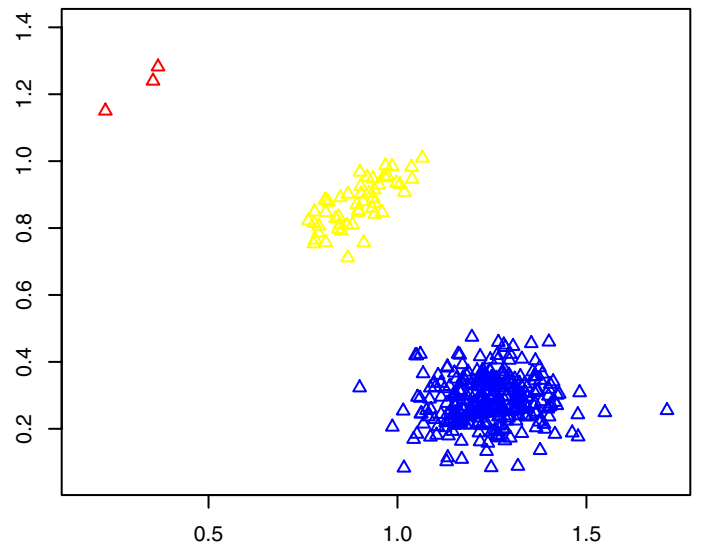

**rs3117425**

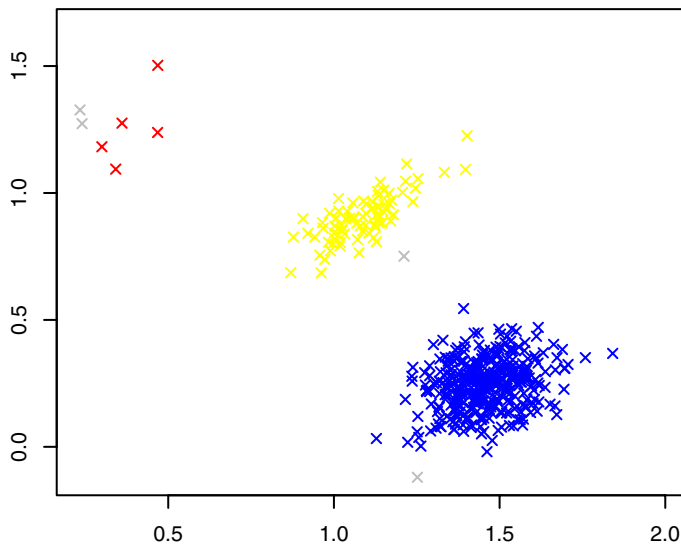

**rs3117425**

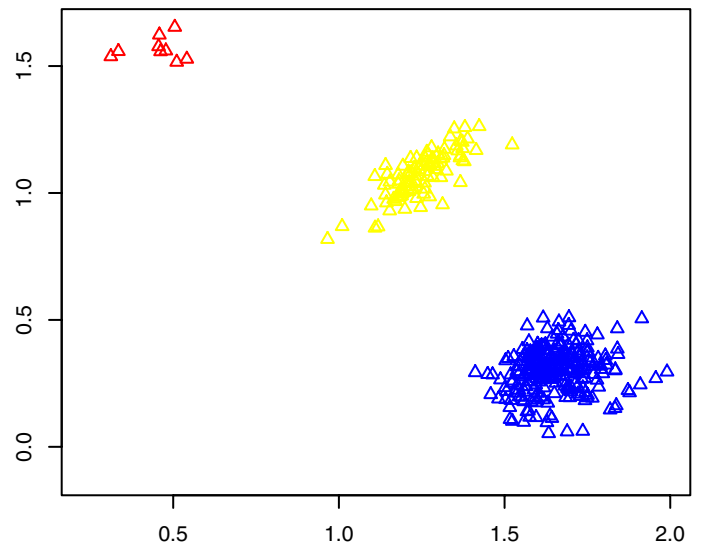

**rs406511**

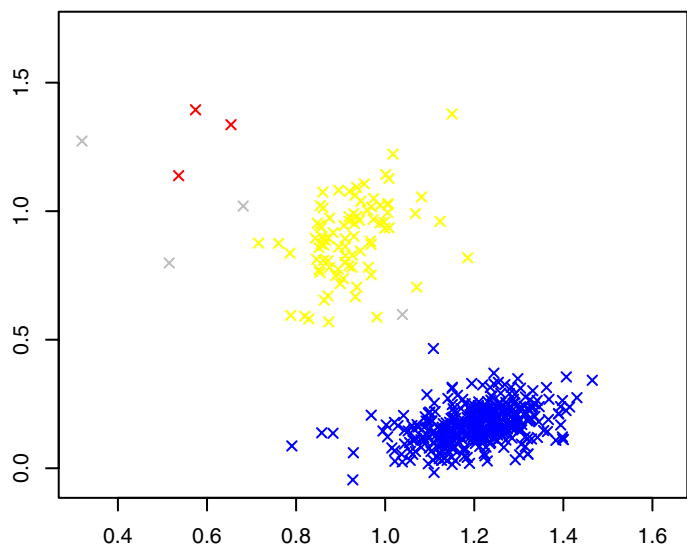

**rs406511**

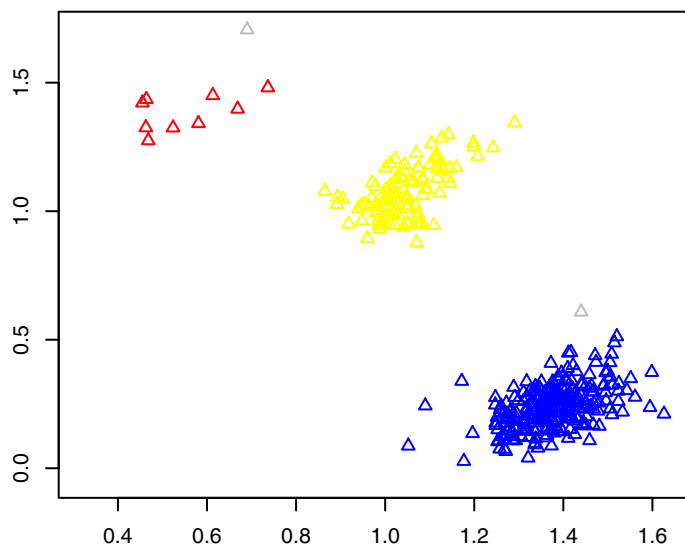

**rs2523443**

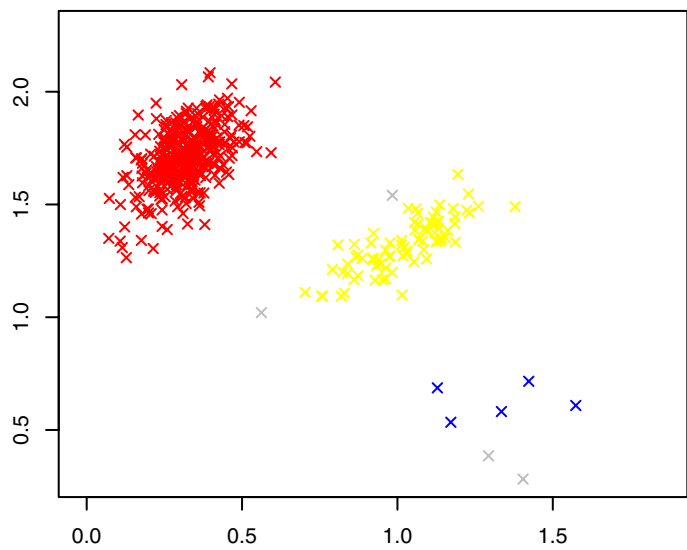

**rs2523443**

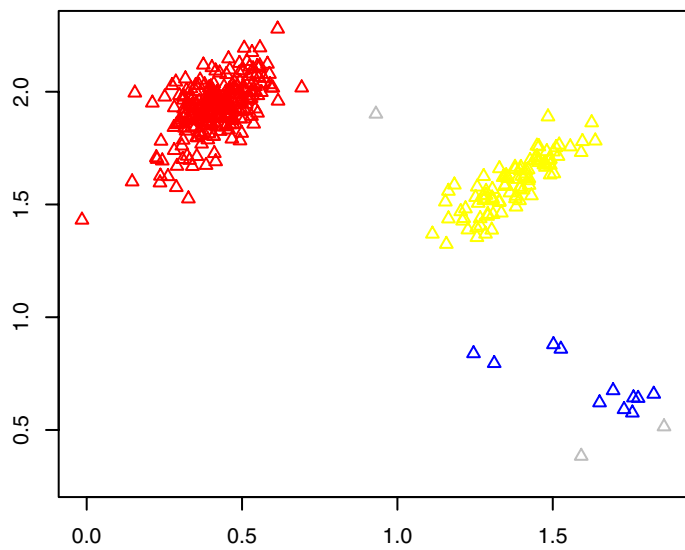

**rs3115631**

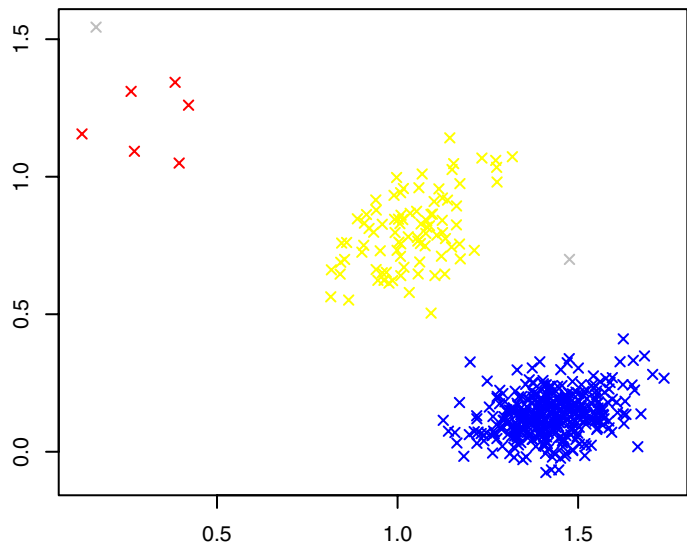

**rs3115631**

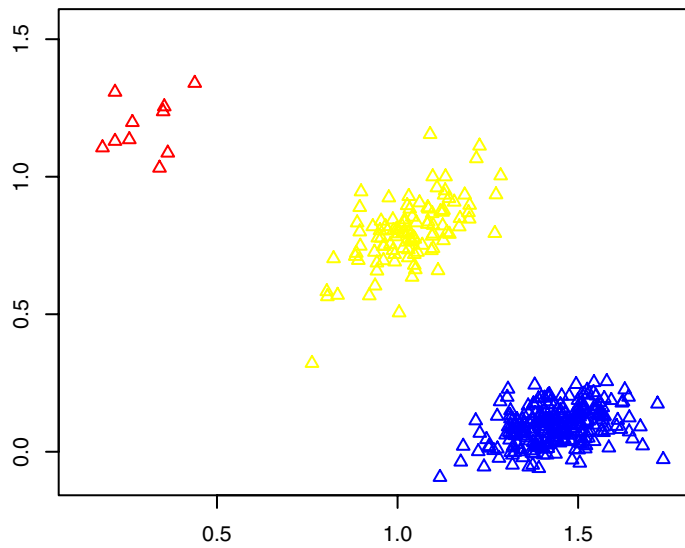

**rs1541269**

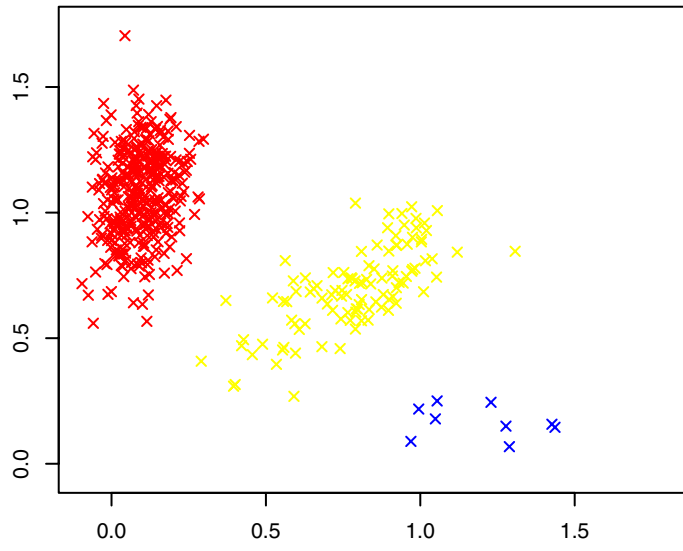

**rs1541269**

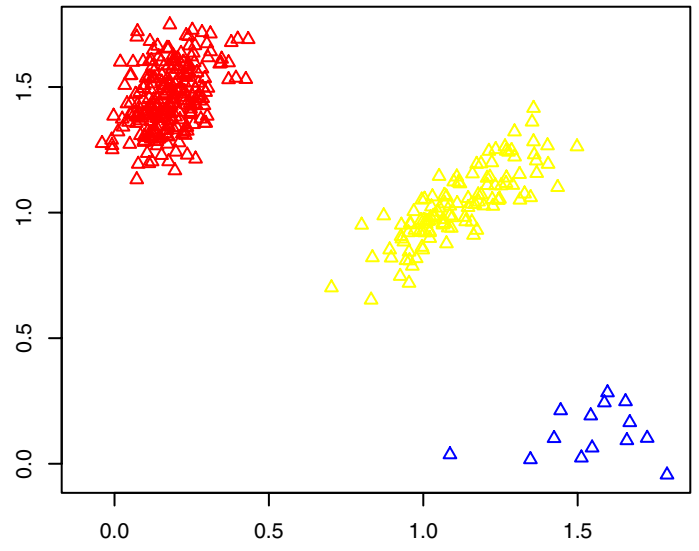

**rs489757**

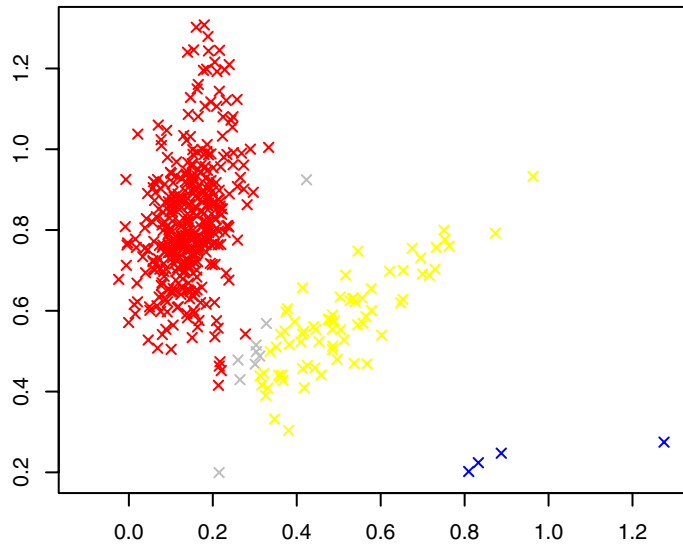

**rs489757**

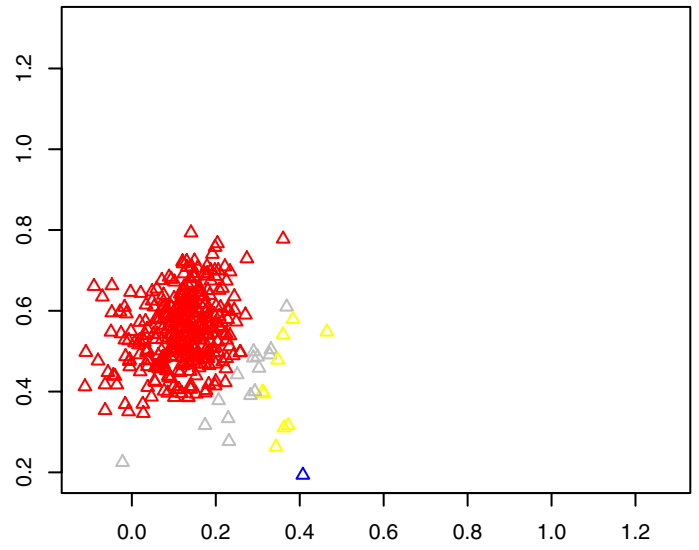

**rs651733**

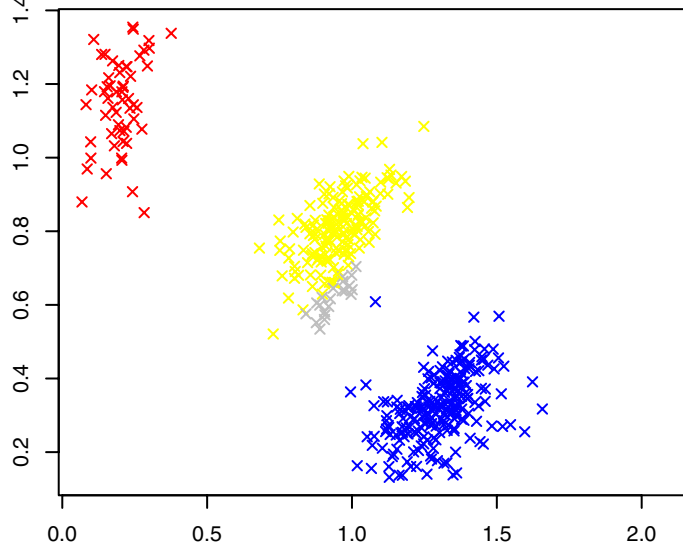

**rs651733**

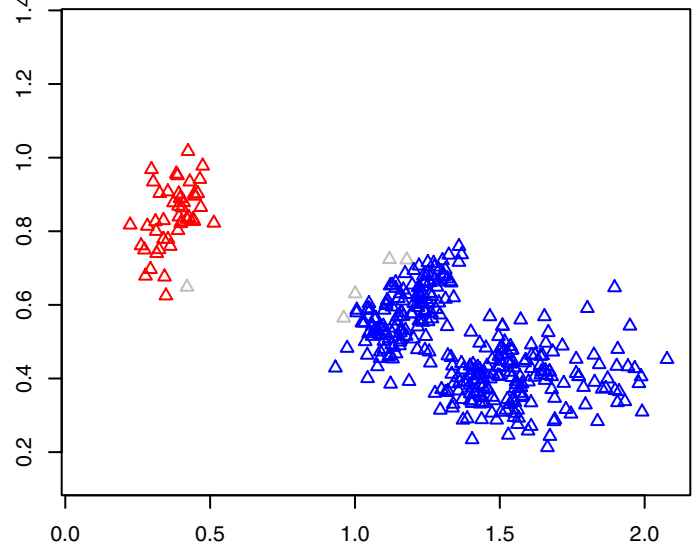

**rs9376318**

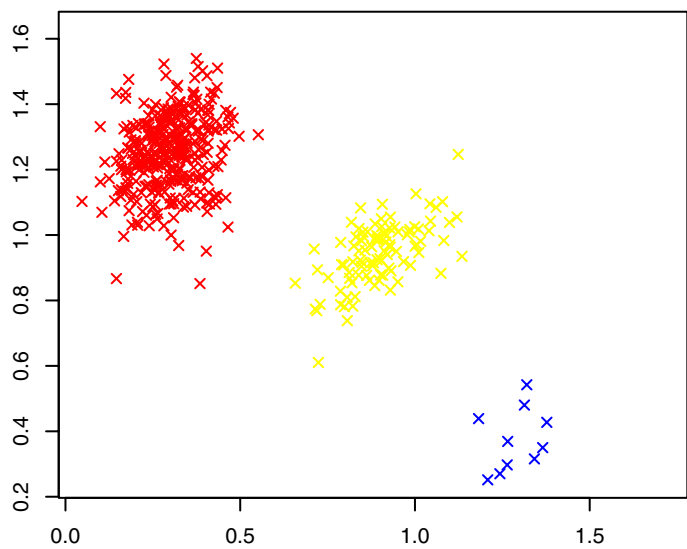

**rs9376318**

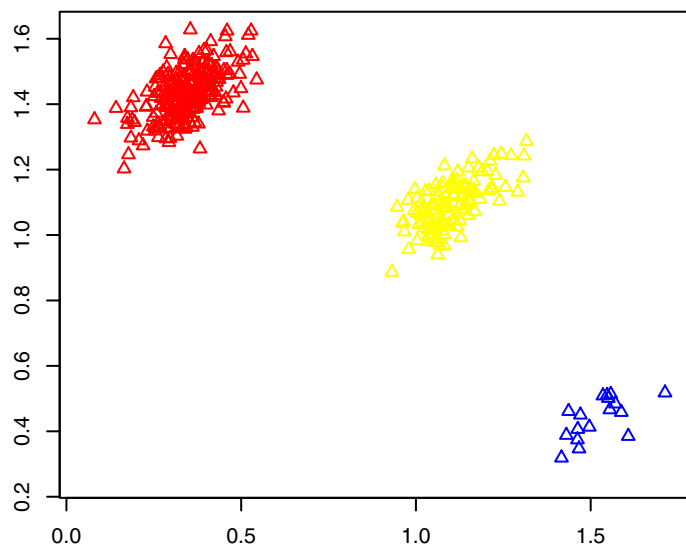

**rs2451648**

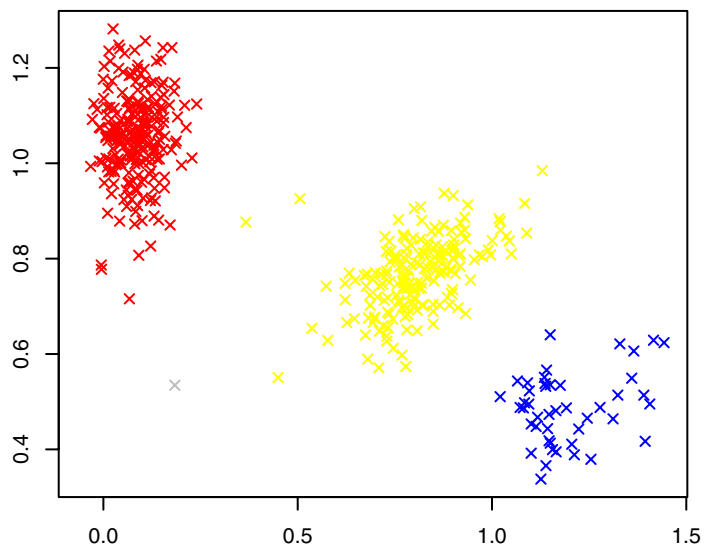

**rs2451648**

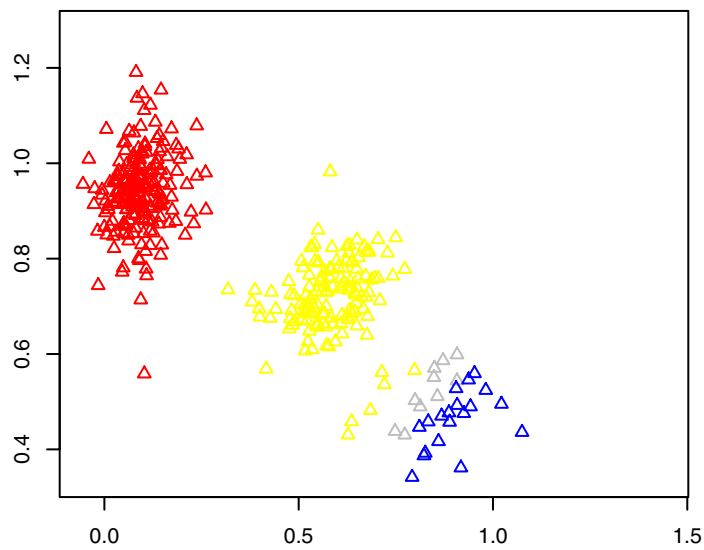

**rs1041637**

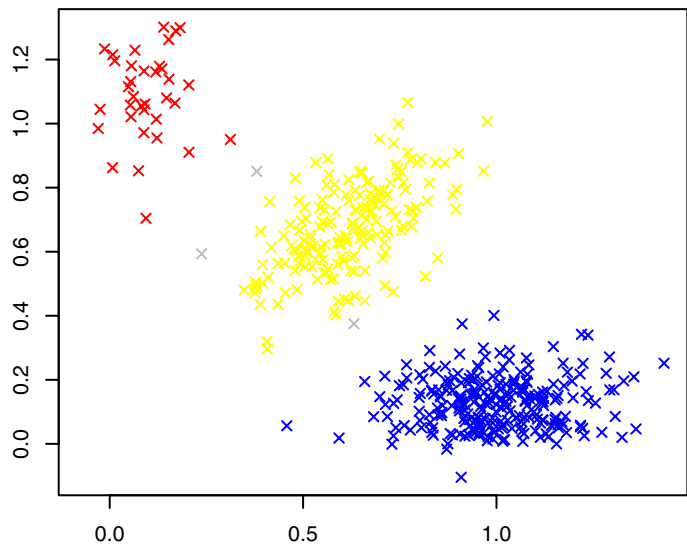

**rs1041637**

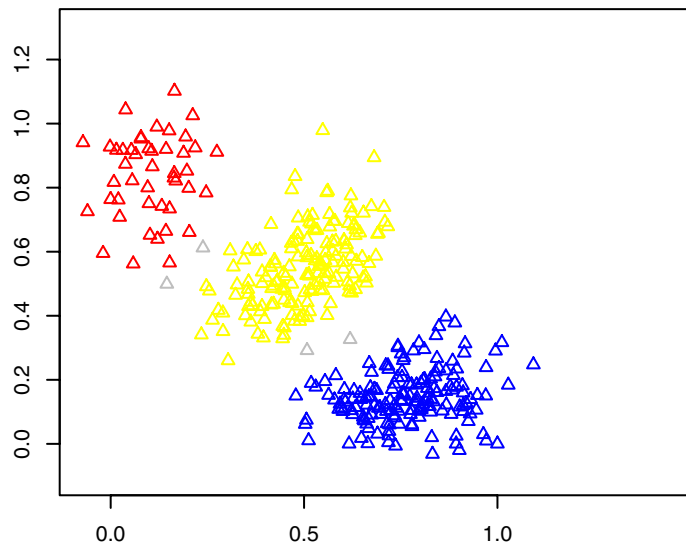

**rs16948916**

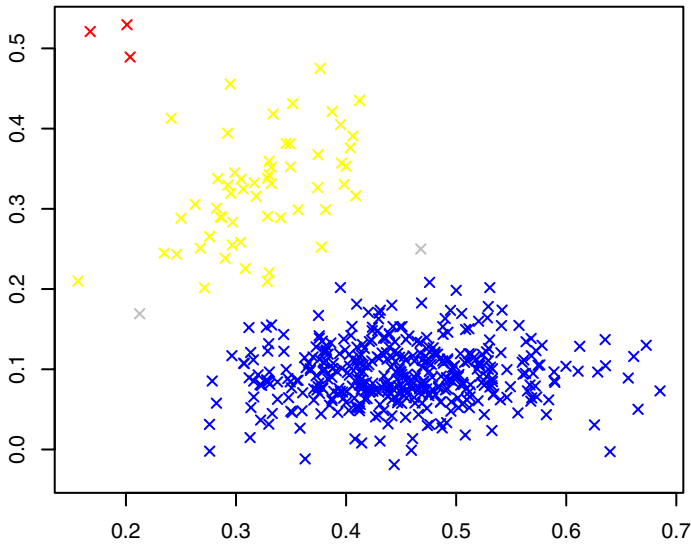

**rs16948916**

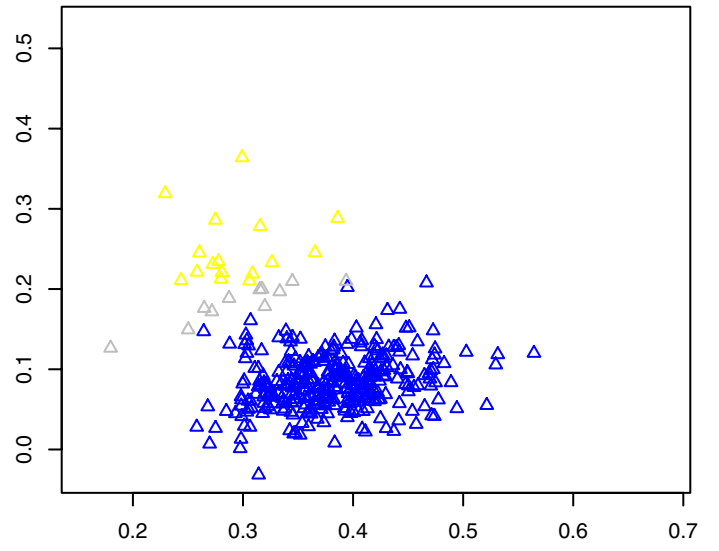

**CG16005854**

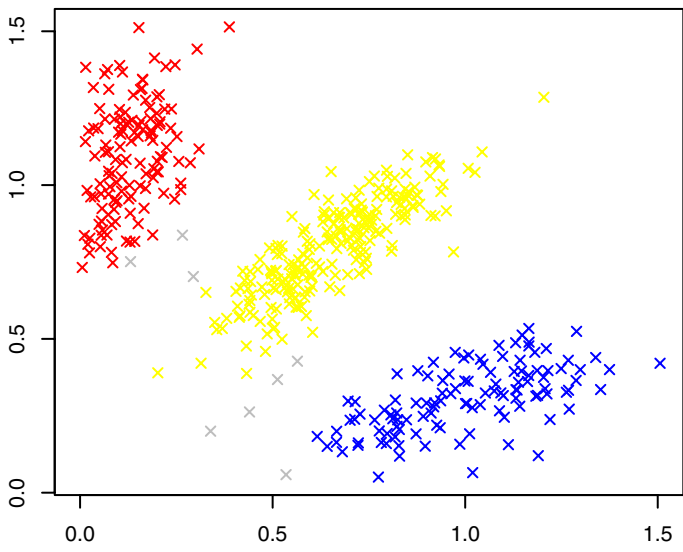

**CG16005854**

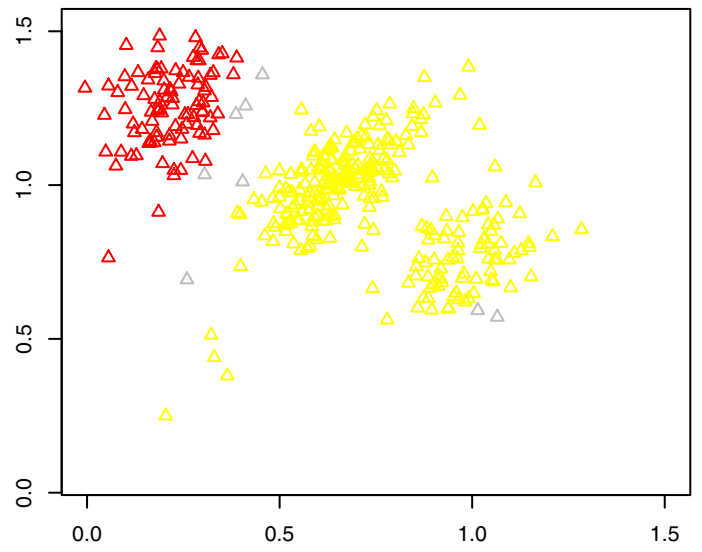

**rs11648136**

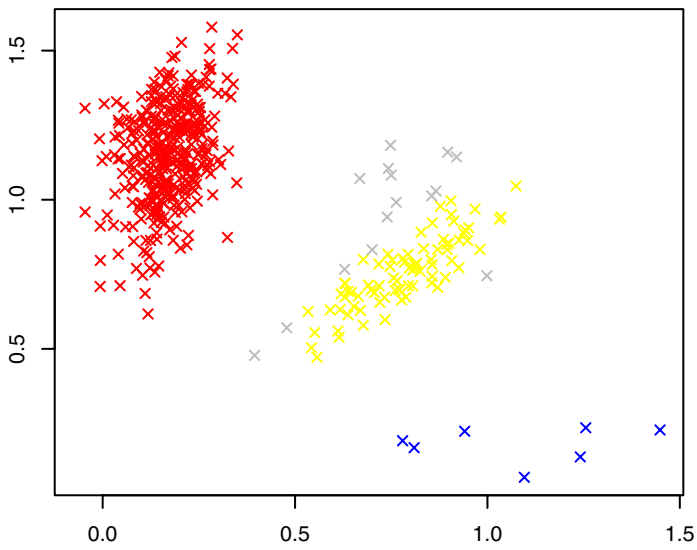

**rs11648136**

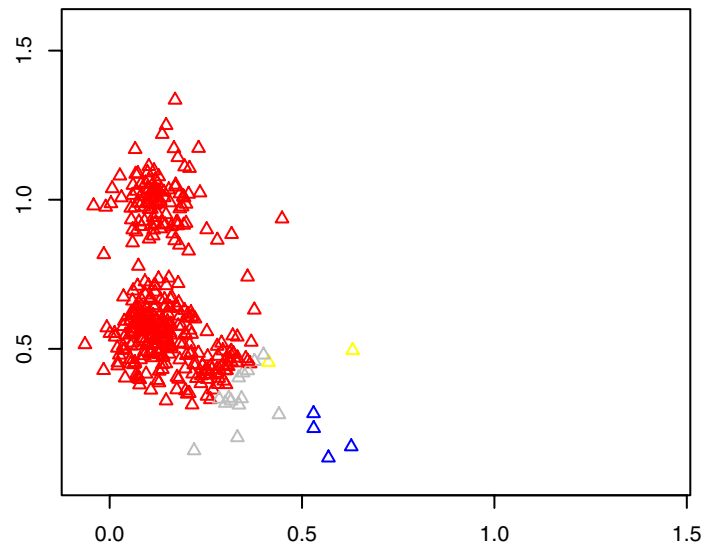



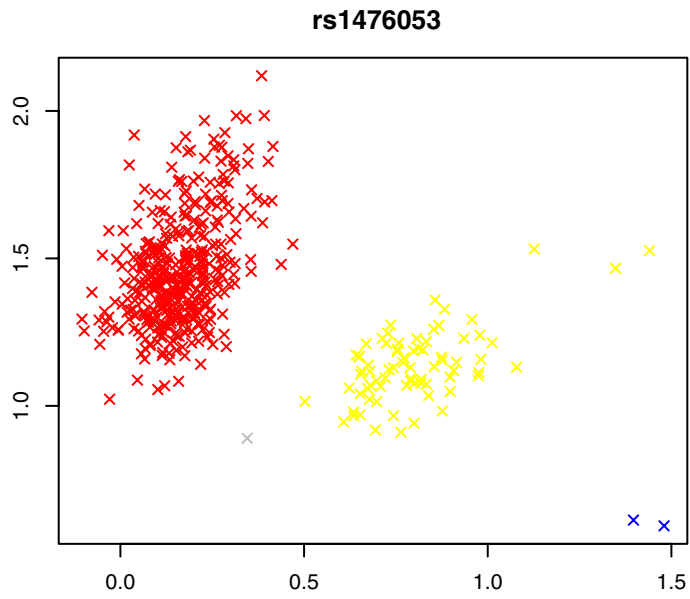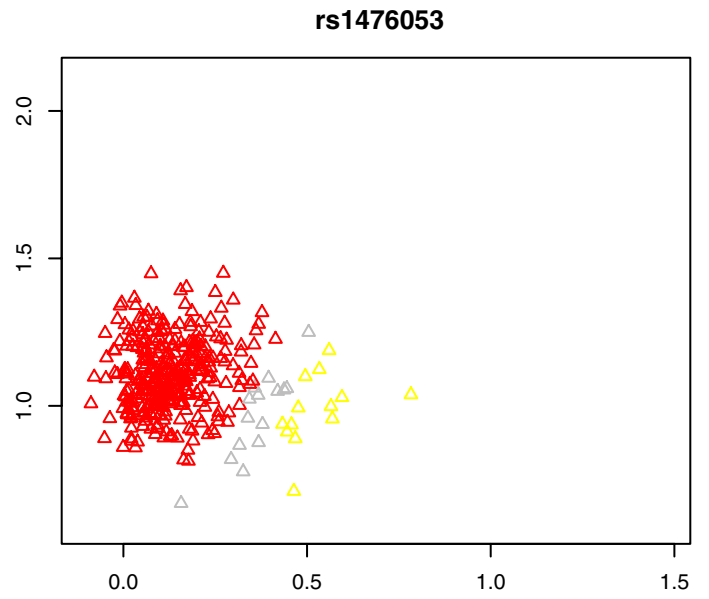

Previous findings for T1D risk loci are from <sup>28</sup> and <sup>29</sup>. Left column shows results from controls; right shows results from cases. Colors highlight the three genotype clusters, with gray being uncalled genotypes.

Figure S2. Genotype Cluster Plots for All SNPs Cited in the Manuscript Supporting Previous Findings for T1D Risk Loci.<sup>28-29</sup>

rs2488457

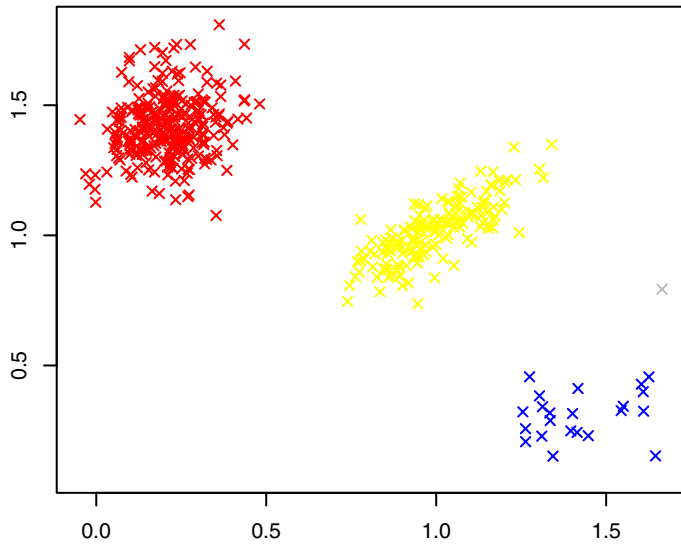

rs2488457

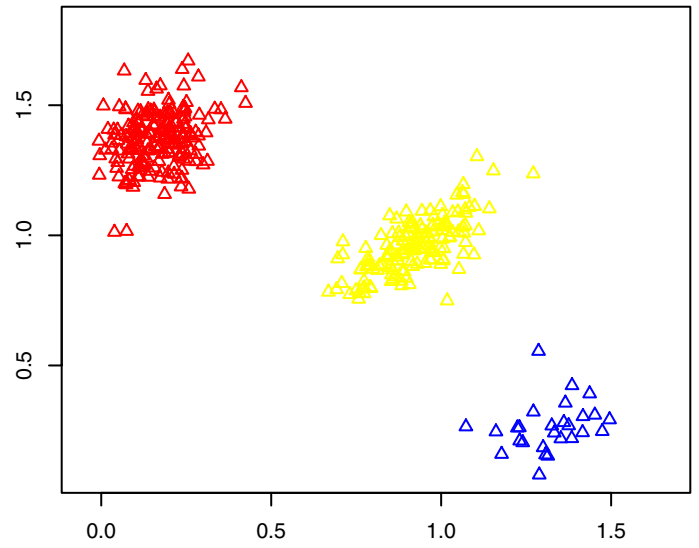

rs3087243

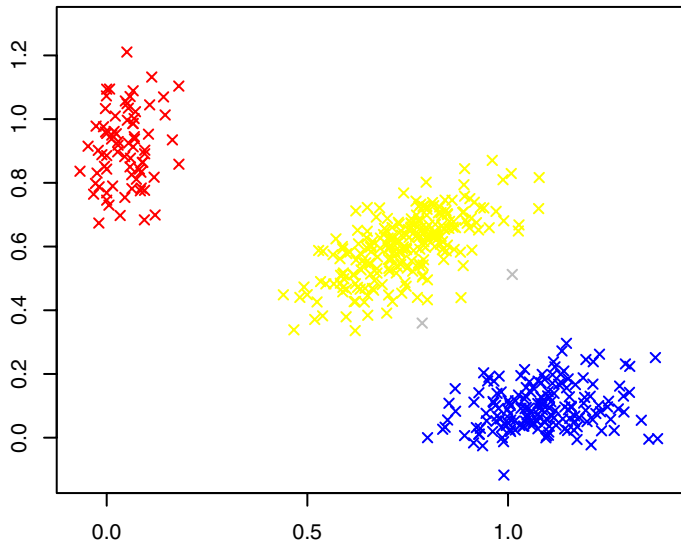

rs3087243

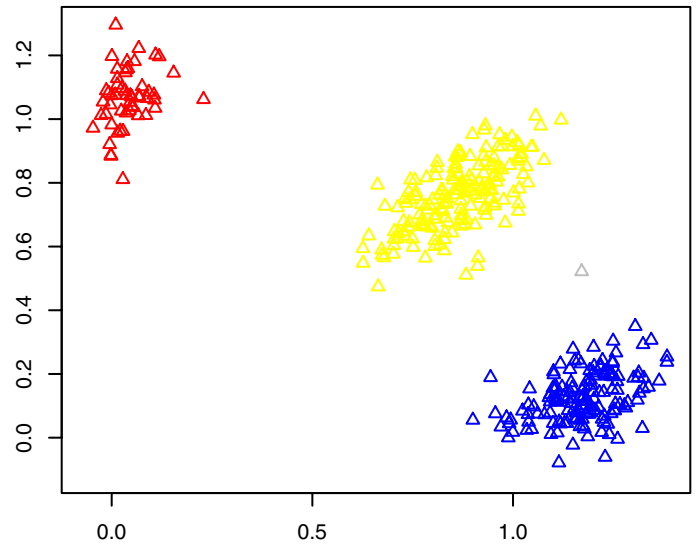

rs231726

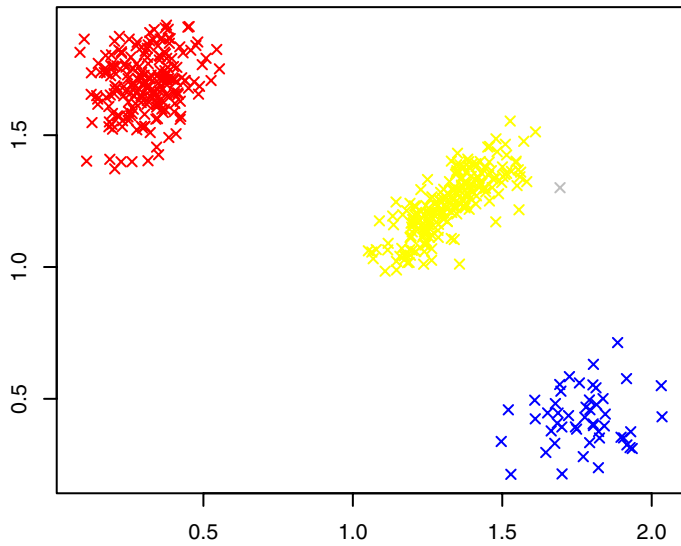

rs231726

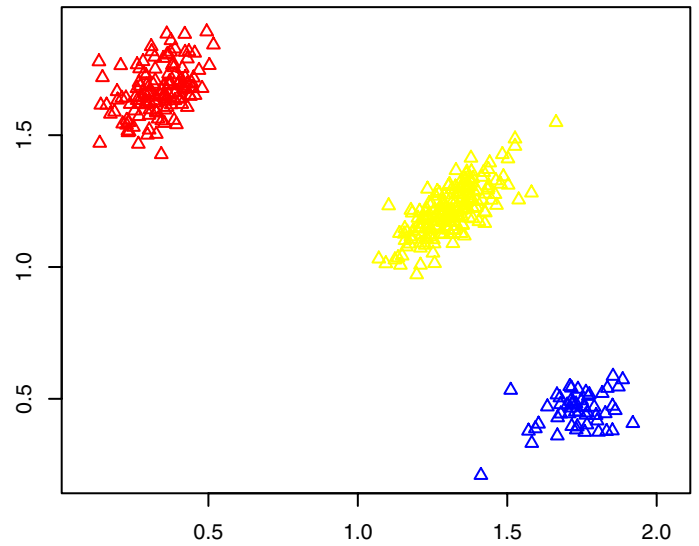

**rs3129934**

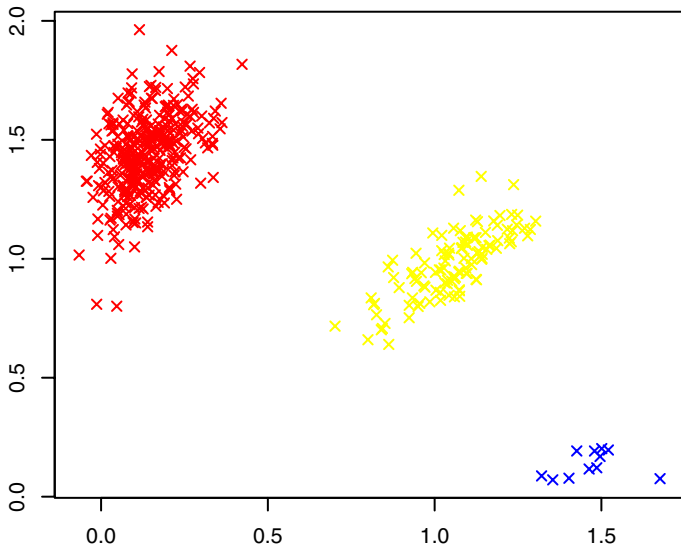

**rs3129934**

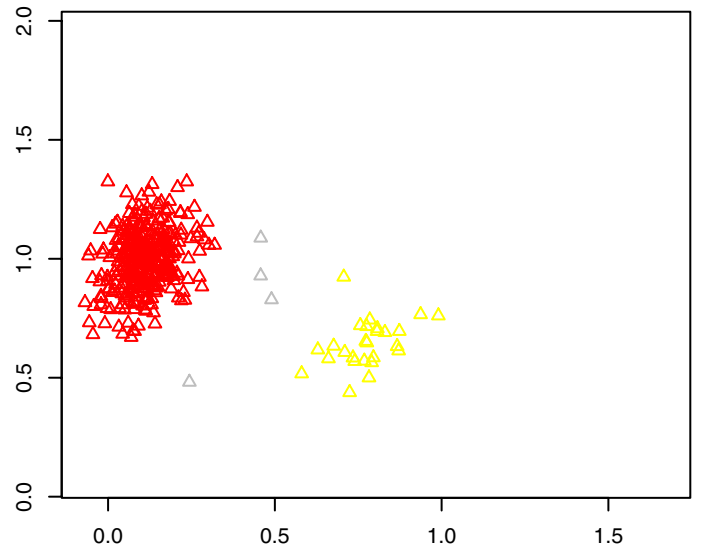

**rs10905669**

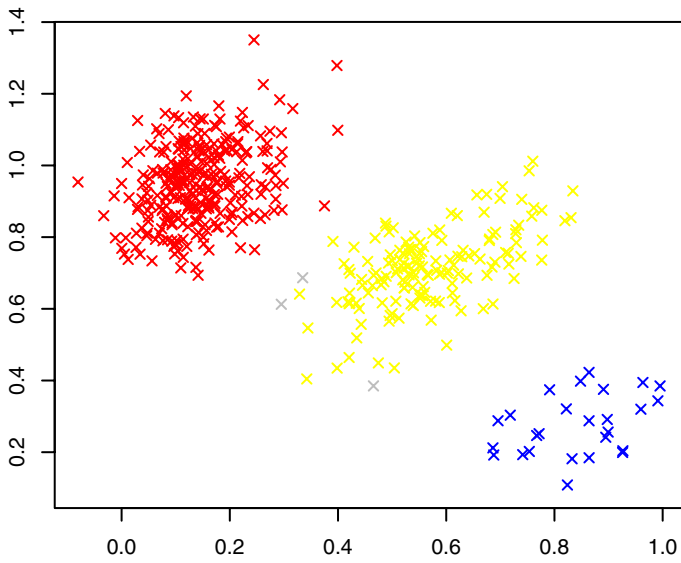

**rs10905669**

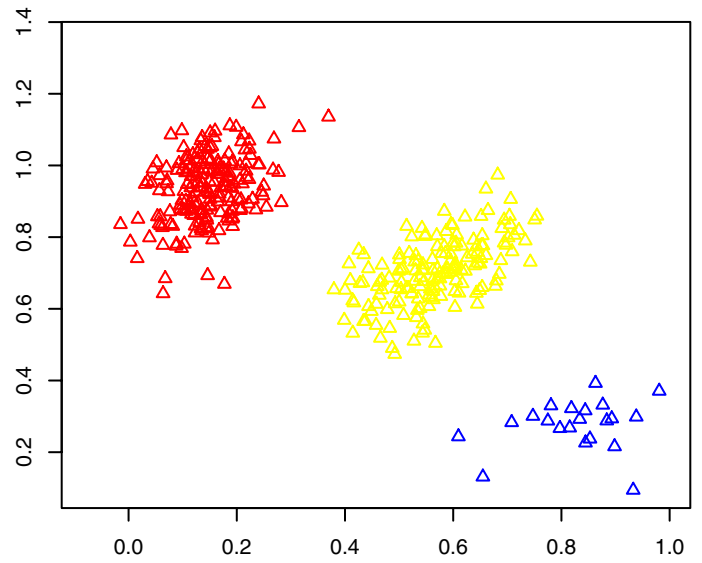

**rs2292239**

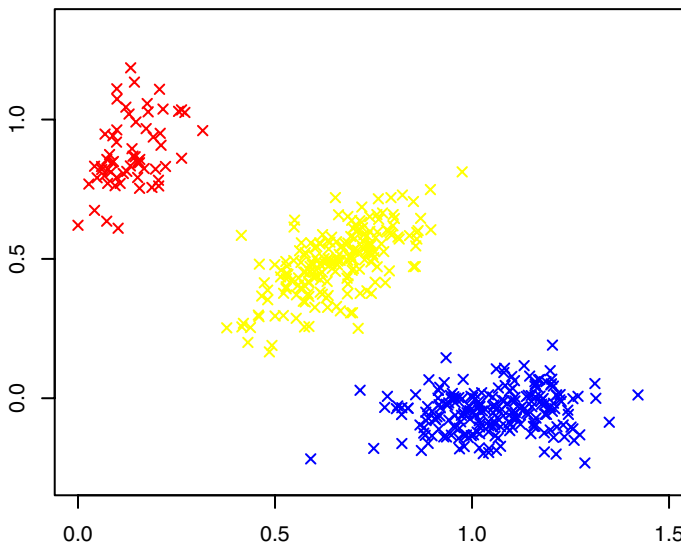

**rs2292239**

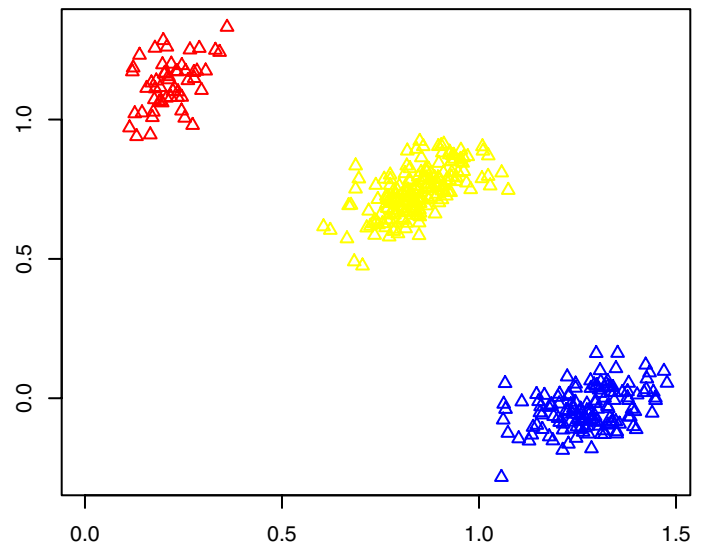

rs11647011

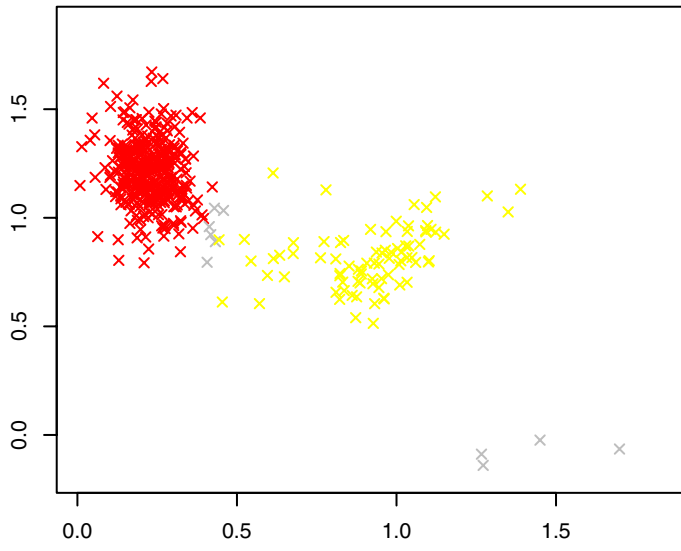

rs11647011

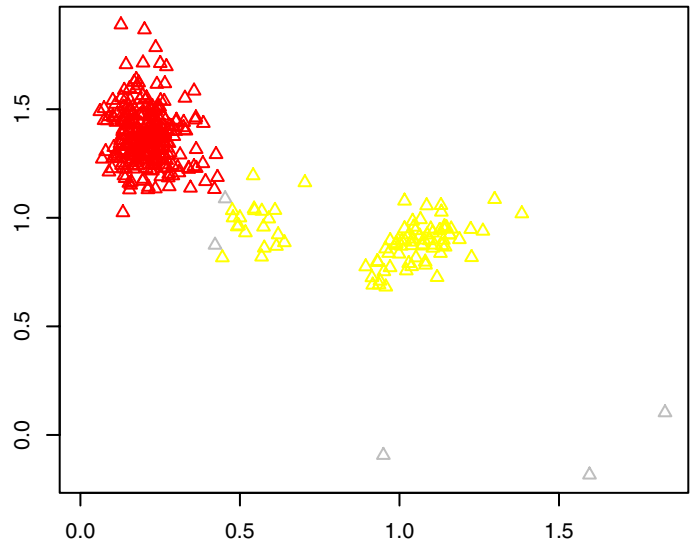

The left column shows results from controls; the right shows results from cases. Colors highlight the three genotype clusters, with gray being uncalled genotypes.
